## Correction for: TRIM29 mediates lung squamous cell carcinoma cell metastasis by regulating autophagic degradation of E-cadherin

Weifeng Xu<sup>1</sup>, Beibei Chen<sup>1</sup>, Dianshan Ke<sup>2</sup>, Xiaobing Chen<sup>1</sup>

<sup>1</sup>Department of Medical Oncology, The Affiliated Cancer Hospital of Zhengzhou University, Zhengzhou 450008, Henan, P.R. China

<sup>2</sup>Department of Cell Biology, Southern Medical University, Guangzhou 510515, Guangdong, China

**Correspondence to:** Xiaobing Chen, Dianshan Ke; email: [xiaobingchen01@163.com](mailto:xiaobingchen01@163.com), [88234480@qq.com](mailto:88234480@qq.com)

**Original article:** *Aging (Albany NY)* 2020; 12: pp 13488—13501

PMID: 32640423      doi: [10.18632/aging.103451](https://doi.org/10.18632/aging.103451)

**This article has been corrected:** The corresponding author, Dianshan Ke, requested to change the email. The correct email is given below:

**Correspondence to:** Dianshan Ke; email: [kds8810@163.com](mailto:kds8810@163.com)
